# Supplementary material for: The power of tumor sizes in predicting the survival of solitary hepatocellular carcinoma patients
Source: PubMed Central journal article supplement (PMC6308097; doi:10.1002/cam4.1873), 2018-11-14
Supplement: CAM4-7-6040-s001.pdf [file CAM4-7-6040-s001.pdf]

Supplementary Table 1. Univariate and multivariate Cox proportional hazards regression analyses for the impact of tumor size on DSS.

| Characteristics                           | Number (%)                 | Univariate         |         | Multivariate        |         |
|-------------------------------------------|----------------------------|--------------------|---------|---------------------|---------|
|                                           |                            | HR (95%CI)         | P value | Adjusted HR (95%CI) | P value |
| Gender (Male/Female)                      | 11890 (74.2) / 4142 (25.8) | 1.01 (0.95 – 1.06) | 0.83    |                     |         |
| Age ( $\leq 63$ / $> 63$ )                | 9133 (57.0) / 6899 (43.0)  | 1.54 (1.47 – 1.62) | < 0.001 | 1.17 (1.02 – 1.35)  | 0.03    |
| Year of diagnosis                         |                            |                    | < 0.001 |                     | 0.002   |
| 2004 – 2007                               | 4729 (29.5)                | 1 (reference)      |         | 1 (reference)       |         |
| 2008 – 2010                               | 5016 (31.3)                | 0.94 (0.89 – 0.99) | 0.03    | 0.76 (0.62 – 0.94)  | 0.01    |
| 2011 – 2013                               | 6287 (39.2)                | 0.84 (0.79 – 0.89) | < 0.001 | 0.68 (0.54 – 0.84)  | < 0.001 |
| Tumor size (mm)                           |                            |                    | < 0.001 |                     | < 0.001 |
| $\leq 30$                                 | 6197 (38.7)                | 1 (reference)      |         | 1 (reference)       |         |
| 31 – 50                                   | 4309 (26.9)                | 1.64 (1.54 – 1.75) | < 0.001 | 1.77 (1.50 – 2.09)  | < 0.001 |
| $> 50$                                    | 5526 (34.5)                | 3.12 (2.95 – 3.31) | < 0.001 | 2.76 (2.32 – 3.28)  | < 0.001 |
| N classification (N0 / N1)                | 15490 (96.6) / 542 (3.4)   | 2.76 (2.50 – 3.06) | < 0.001 | 1.42 (1.00 – 2.00)  | 0.05    |
| M classification (M0 / M1)                | 14997 (93.5) / 1035 (6.5)  | 4.27 (3.96 – 4.60) | < 0.001 | 3.32 (2.58 – 4.27)  | < 0.001 |
| Vascular invasion (No / Yes)              | 14242 (88.8) / 1790 (11.2) | 1.01 (0.94 – 1.09) | 0.74    |                     |         |
| AFP level (Normal and Bordline/ Elevated) | 4073 (25.4) / 8556 (78.8)  | 1.68 (1.58 – 1.78) | < 0.001 | 1.44 (1.24 – 1.67)  | < 0.001 |
| Fibrosis score (0 – 4 / 5 – 6)            | 1060 (22.4) / 3681 (77.6)  | 1.23 (1.09 – 1.39) | 0.001   | 1.45 (1.19 – 1.76)  | < 0.001 |
| Surgery type                              |                            |                    | < 0.001 |                     | < 0.001 |
| No surgery                                | 9406 (58.9)                | 1 (reference)      |         | 1 (reference)       |         |
| RFA                                       | 2019 (12.6)                | 0.37 (0.35 – 0.41) | < 0.001 | 0.54 (0.44 – 0.67)  | < 0.001 |
| Liver resection                           | 2501 (15.7)                | 0.31 (0.28 – 0.33) | < 0.001 | 0.35 (0.28 – 0.44)  | < 0.001 |
| Liver transplantation                     | 1407 (8.8)                 | 0.09 (0.08 – 0.11) | < 0.001 | 0.08 (0.05 – 0.14)  | < 0.001 |
| Other surgery                             | 637 (4.0)                  | 0.55 (0.49 – 0.62) | < 0.001 | 0.64 (0.41 – 1.01)  | 0.05    |
| Race                                      |                            |                    | < 0.001 |                     | < 0.001 |
| American Indian/Alaska Native             | 177 (1.1)                  | 1 (reference)      |         | 1 (reference)       |         |
| White                                     | 10844 (67.9)               | 0.92 (0.74 – 1.15) | 0.46    | 0.87 (0.50 – 1.51)  | 0.61    |
| Black                                     | 1936 (12.1)                | 1.04 (0.83 – 1.30) | 0.73    | 0.96 (0.54 – 1.71)  | 0.89    |
| Asian or Pacific Islander                 | 3009 (18.8)                | 0.68 (0.54 – 0.85) | 0.001   | 0.49 (0.27 – 0.87)  | 0.01    |
| Marriage status                           |                            |                    | < 0.001 |                     |         |
| Widowed                                   | 1538 (10.0)                | 1 (reference)      |         |                     |         |
| Divorced or separated or single           | 5395 (35.2)                | 0.73 (0.67 – 0.79) | < 0.001 |                     |         |
| Married                                   | 8413 (54.8)                | 0.61 (0.57 – 0.66) | < 0.001 |                     |         |
| Insurance status (Uninsured / Insured)    | 433 (4.2) / 9957 (95.8)    | 0.59 (0.52 – 0.68) | < 0.001 |                     |         |

Abbreviations: DSS, Disease-specific survival; HR, hazard ratio; AFP, alpha fetoprotein; RFA, radiofrequency ablation.

### DSS

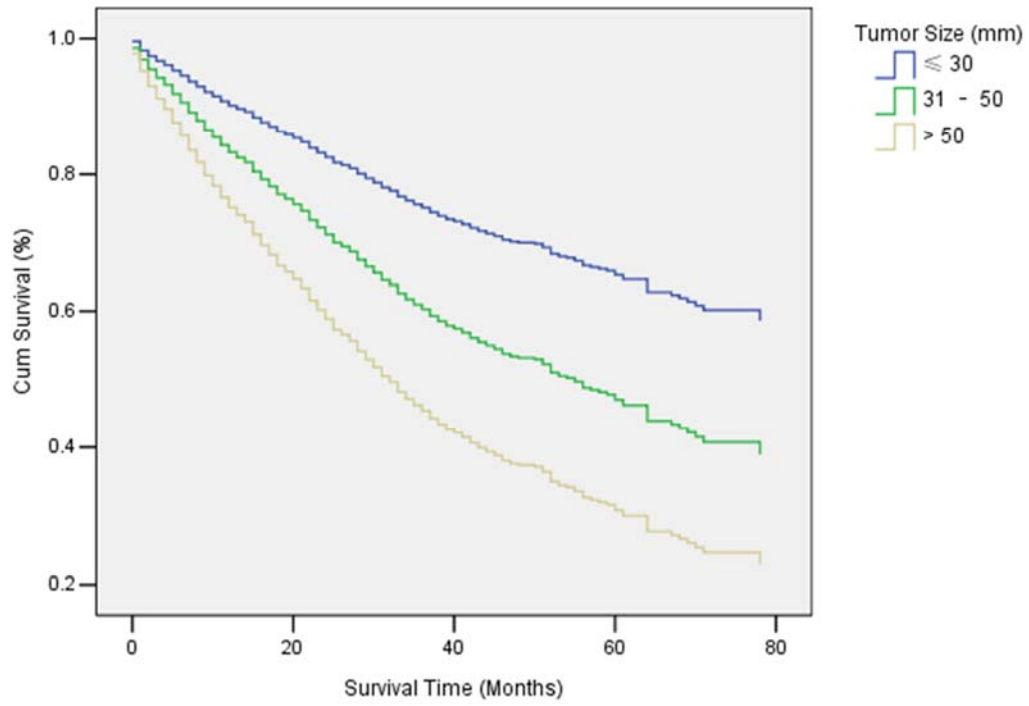

Supplementary Figure 1. Adjusted disease-specific survival by tumor size for the whole study population.

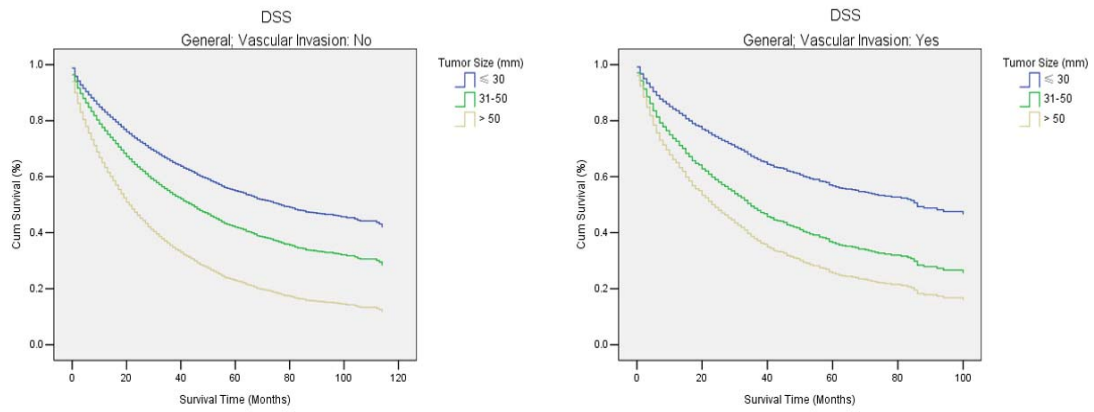

Supplementary Figure 2. Adjusted disease-specific survival by tumor size for patients with or without vascular invasion.
